# Supplementary material for: Syntheses, structures and photoluminescence of Zn(ii), Ag(i), Cu(i) and Co(ii) coordination polymers of a tetrapyridyl ligand
Source: Royal Society of Chemistry journal article supplement (doi:10.1039/c3ra43405b), 2013-01-01
Supplement: c3ra43405b.pdf [file c3ra43405b.pdf]

## Supporting Information

### Syntheses, Structures, and Photoluminescence of Zn(II), Ag(I), Cu(I) and Co(II) Coordination Polymers of a Tetrapyridyl Ligand

Yun-Yu Tang, Cai-Xia Ding, Seik-Weng Ng, Yong-Shu Xie\*

5

Key Laboratory for Advanced Materials and Institute of Fine Chemicals, East China University of Science & Technology, Shanghai 200237, P. R. China. Department of Chemistry, University of Malaya, Kuala Lumpur, Malaysia. Chemistry Department, Faculty of Science, King Abdulaziz University, PO Box 80203 Jeddah, Saudi Arabia.

10

15 **\*Corresponding Author: *Yongshu Xie***  
**Telephone number: (86)-21-64250772**  
**E-mail address: [yshxie@ecust.edu.cn](mailto:yshxie@ecust.edu.cn)**

20

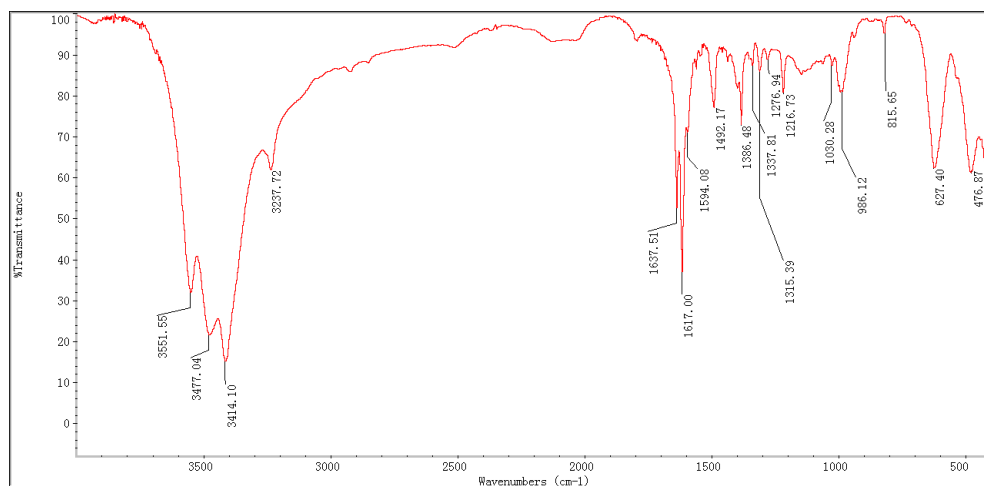

**Fig. S1.** IR spectra of Complex 1.

25

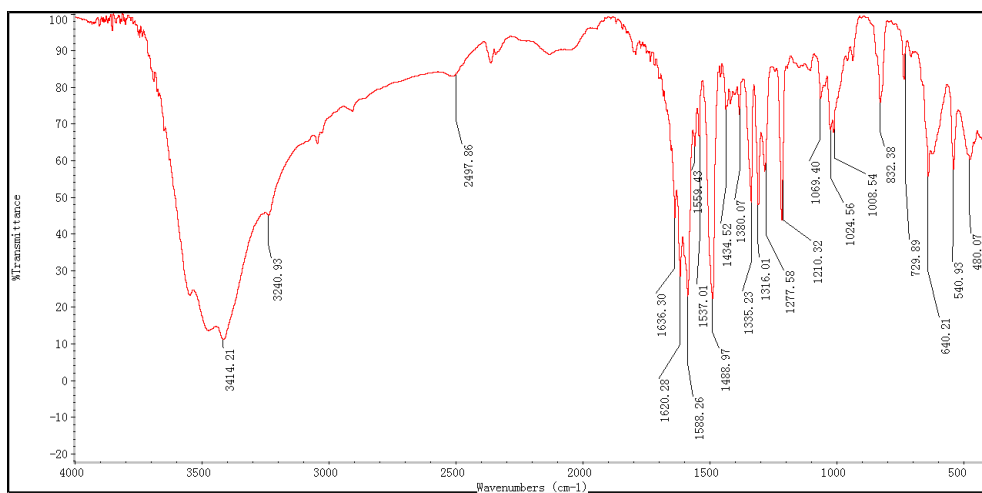

**Fig. S2.** IR spectra of Complex 2.

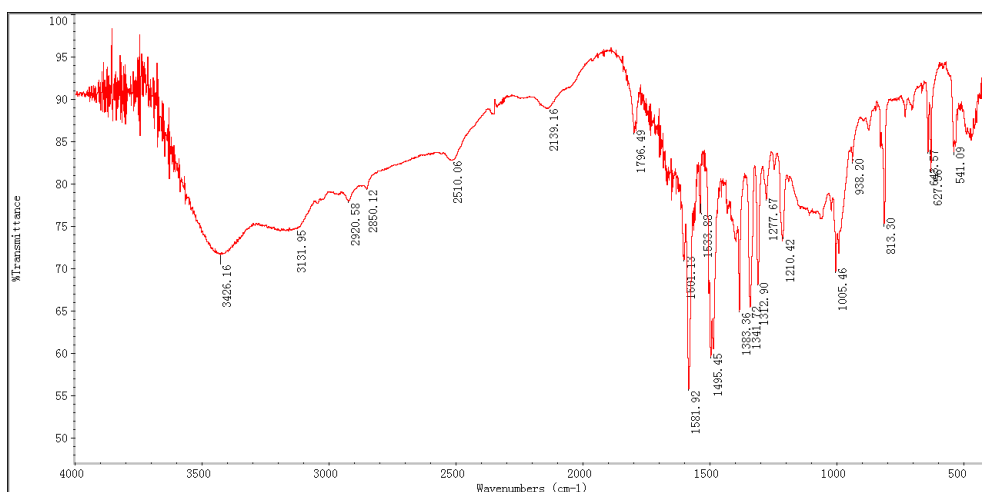

**Fig. S3.** IR spectra of Complex 3.

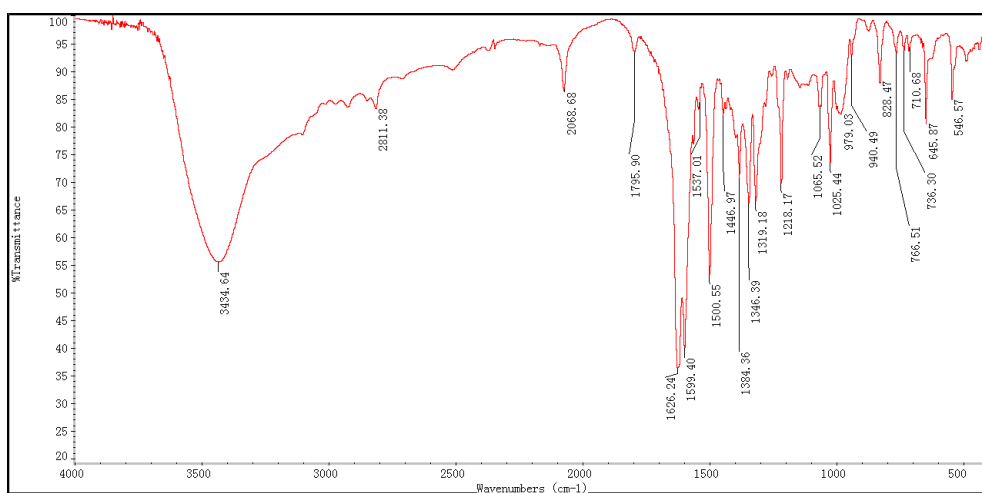

**Fig. S4.** IR spectra of Complex 4.

5

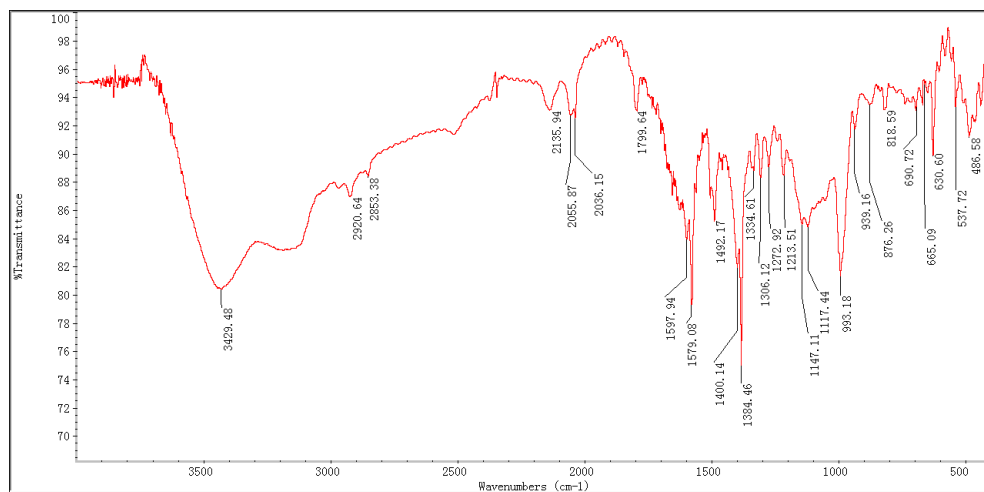

Fig. S5. IR spectra of Complex 5.

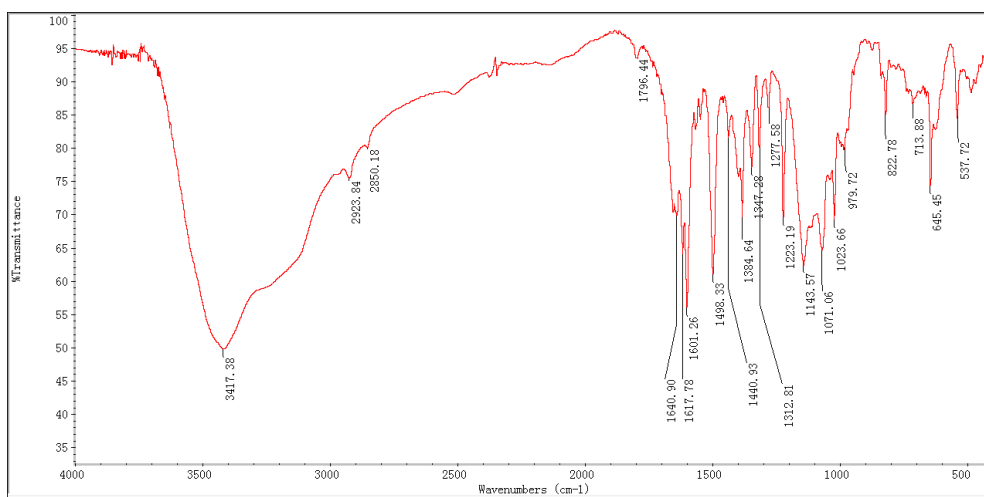

Fig. S6. IR spectra of Complex 6.

5

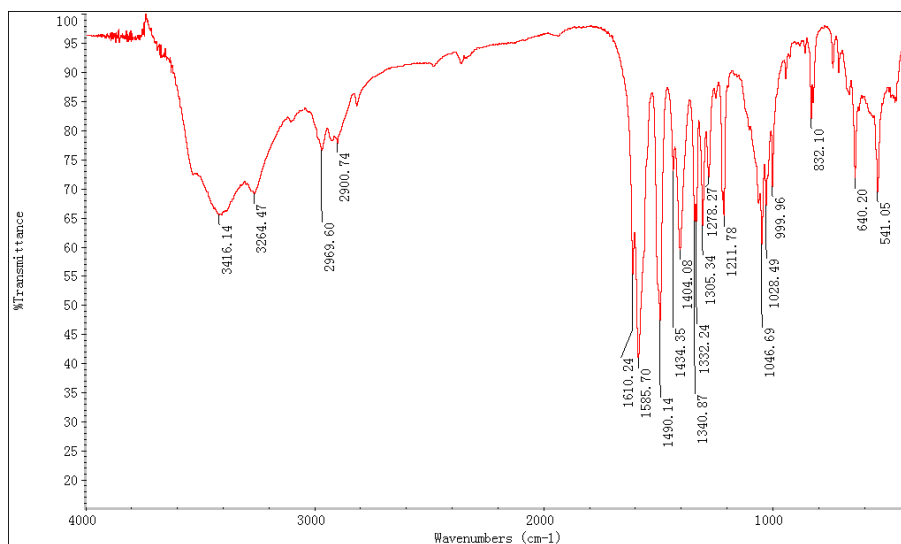

**Fig. S7.** IR spectra of Complex 7.

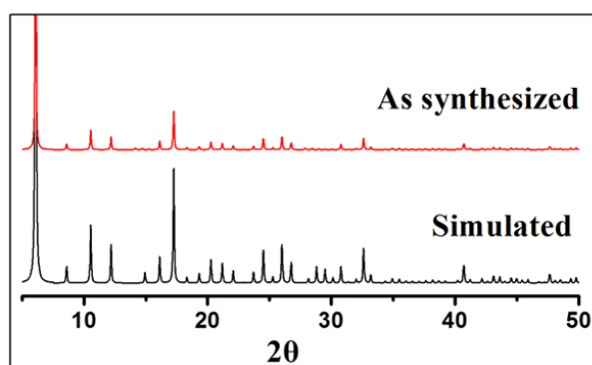

**Fig. S8.** PXRD of Complex 1.

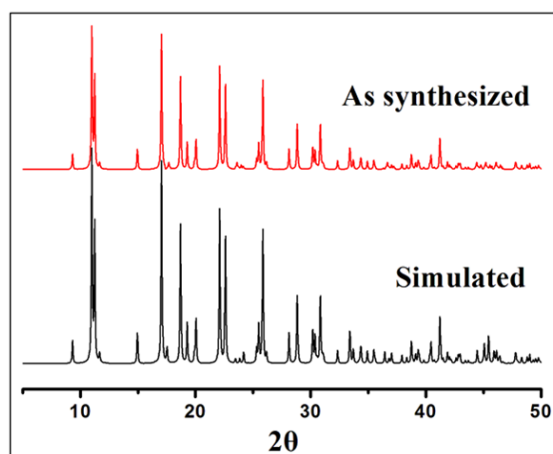

**Fig. S9.** PXRD of Complex 2.

5

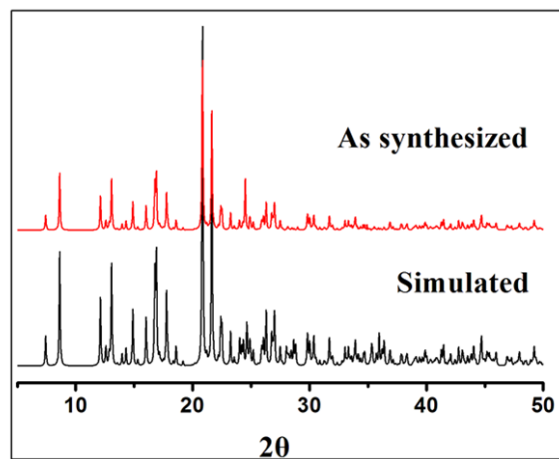

**Fig S10.** PXRD of Complex 3.

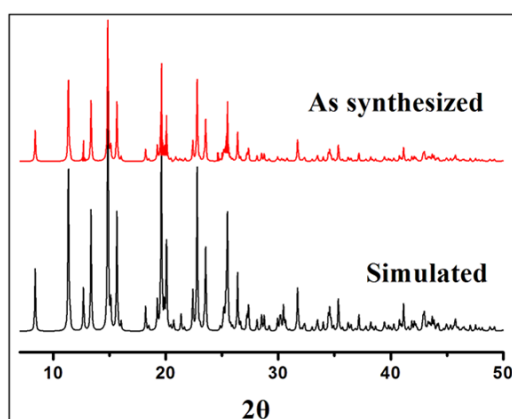

**Fig. S11.** PXRD of Complex 4.

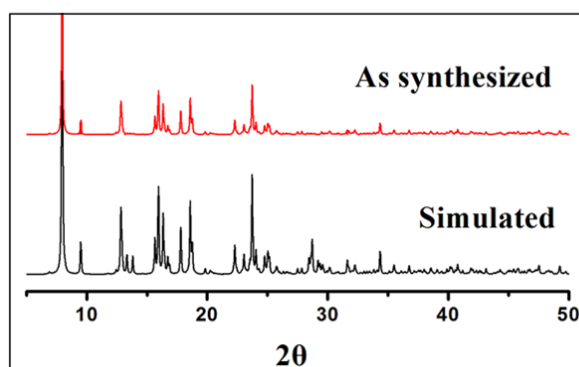

**Fig. S12.** PXRD of Complex 6.

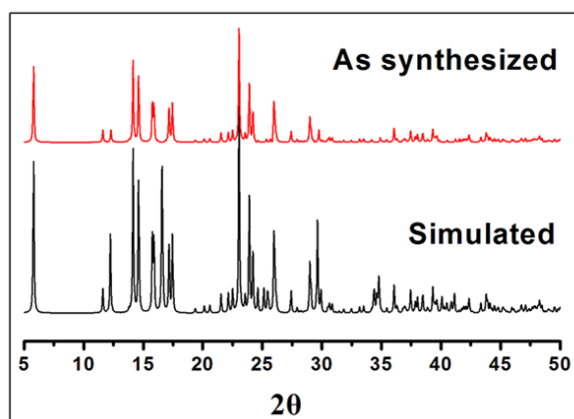

**Fig. S13.** PXRD of Complex 7.

**Table S1** Selected Bond lengths (Å) and Angles (°) for the metal complexes.

| Complex 1                                                                     |            |                     |            |                      |            |                       |            |
|-------------------------------------------------------------------------------|------------|---------------------|------------|----------------------|------------|-----------------------|------------|
| Cu(1)-N(1)                                                                    | 1.939(4)   | N(1)-Cu(1)-N(2)     | 142.00(19) | N(2)-Cu(1)-Cl(1)     | 108.58(14) | C(6)-N(2)-Cu(1)       | 123.0(4)   |
| Cu(1)-N(2)                                                                    | 1.939(4)   | N(1)-Cu(1)-Cl(1)    | 108.55(14) | C(1)-N(1)-Cu(1)      | 120.3(4)   | C(10)-N(2)-Cu(1)      | 120.5(4)   |
| Cu(1)-Cl(1)                                                                   | 2.3147(17) |                     |            |                      |            |                       |            |
| Complex 2                                                                     |            |                     |            |                      |            |                       |            |
| Cu(1)-N(1)                                                                    | 2.045(5)   | Cu(1)-Cl(1)         | 2.4219(19) | N(1)-Cu(1)-Cl(1)#2   | 115.59(16) | N(1)#1-Cu(1)-Cl(1)    | 115.59(16) |
| Cu(1)-N(1)#1                                                                  | 2.045(5)   | Cl(1)-Cu(1)#2       | 2.4219(19) | N(1)#1-Cu(1)-Cl(1)#2 | 105.51(15) | Cl(1)#2-Cu(1)-Cl(1)   | 101.49(8)  |
| Cu(1)-Cl(1)#2                                                                 | 2.4219(19) | N(1)-Cu(1)-N(1)#1   | 112.9(3)   | N(1)-Cu(1)-Cl(1)     | 105.51(15) | Cu(1)#2-Cl(1)-Cu(1)   | 78.51(8)   |
| Symmetry transformations used to generate equivalent atoms: #1 -x+1,y,-z+1    |            |                     |            | #2 -x+1,-y+1,-z+1    |            |                       |            |
| Complex 3                                                                     |            |                     |            |                      |            |                       |            |
| Cu(1)-N(3)                                                                    | 2.086(3)   | Cu(1)-I(1)          | 2.5623(5)  | N(5)-Cu(1)-N(2)      | 98.12(10)  | N(2)-Cu(1)-I(1)       | 118.43(8)  |
| Cu(1)-N(5)                                                                    | 2.090(3)   | N(3)-Cu(1)-N(5)     | 111.69(11) | N(3)-Cu(1)-I(1)      | 110.32(8)  |                       |            |
| Cu(1)-N(2)                                                                    | 2.106(3)   | N(3)-Cu(1)-N(2)     | 102.81(11) | N(5)-Cu(1)-I(1)      | 114.48(8)  |                       |            |
| Complex 4                                                                     |            |                     |            |                      |            |                       |            |
| Zn(1)-O(3)                                                                    | 1.934(10)  | Zn(1)-N(3)          | 2.089(9)   | O(1)-Zn(1)-N(2)      | 106.4(4)   | N(2)-Zn(1)-N(3)       | 110.9(4)   |
| Zn(1)-O(1)                                                                    | 1.949(10)  | O(3)-Zn(1)-O(1)     | 110.8(5)   | O(3)-Zn(1)-N(3)      | 97.4(4)    |                       |            |
| Zn(1)-N(2)                                                                    | 2.047(9)   | O(3)-Zn(1)-N(2)     | 112.5(4)   | O(1)-Zn(1)-N(3)      | 118.7(4)   |                       |            |
| Complex 5                                                                     |            |                     |            |                      |            |                       |            |
| Ag(1)-N(2)                                                                    | 2.255(15)  | Ag(2)-N(13)         | 2.42(2)    | N(2)-Ag(1)-N(3)#1    | 114.9(6)   | N(12)#2-Ag(2)-N(16)   | 127.9(7)   |
| Ag(1)-N(3)#1                                                                  | 2.265(16)  | N(3)-Ag(1)#2        | 2.265(16)  | N(2)-Ag(1)-N(7)      | 135.6(7)   | N(11)-Ag(2)-N(16)     | 100.2(6)   |
| Ag(1)-N(7)                                                                    | 2.316(16)  | N(4)-Ag(1)#3        | 2.46(2)    | N(3)#1-Ag(1)-N(7)    | 98.7(7)    | N(12)#2-Ag(2)-N(13)   | 105.4(7)   |
| Ag(1)-N(4)                                                                    | 2.46(2)    | N(7)-Ag(1)#3        | 2.316(16)  | N(2)-Ag(1)-N(4)      | 96.4(7)    | N(11)-Ag(2)-N(13)     | 122.3(8)   |
| Ag(2)-N(12)#2                                                                 | 2.241(14)  | N(12)-Ag(2)#1       | 2.241(13)  | N(3)#1-Ag(1)-N(4)    | 126.4(7)   | N(16)-Ag(2)-N(13)     | 84.1(7)    |
| Ag(2)-N(11)                                                                   | 2.283(14)  | N(13)-Ag(2)#3       | 2.42(2)    | N(7)-Ag(1)-N(4)      | 85.0(7)    | Ag(1)#3-N(4)-Ag(1)    | 91.1(10)   |
| Ag(2)-N(16)                                                                   | 2.324(16)  | N(16)-Ag(2)#3       | 2.324(16)  | N(12)#2-Ag(2)-N(11)  | 115.0(5)   | Ag(1)-N(7)-Ag(1)#3    | 98.5(9)    |
| Symmetry transformations used to generate equivalent atoms: #1 x-1,y,z        |            |                     |            | #2 x+1,y,z           |            | #3 x,-y+3/2,          |            |
| Complex 6                                                                     |            |                     |            |                      |            |                       |            |
| Co(1)-O(2)                                                                    | 2.098(4)   | Co(4)-O(11)         | 2.150(4)   | O(4)-Co(2)-N(2)      | 89.93(19)  | N(3)-Co(3)-O(9)       | 87.25(18)  |
| Co(1)-O(2)#1                                                                  | 2.098(4)   | Co(4)-N(4)          | 2.158(5)   | O(4)#2-Co(2)-N(2)    | 90.07(19)  | O(8)#3-Co(3)-O(9)#3   | 86.27(17)  |
| Co(1)-O(1)#1                                                                  | 2.103(4)   | Co(4)-N(4)#4        | 2.158(5)   | N(2)#2-Co(2)-N(2)    | 180.0      | O(8)-Co(3)-O(9)#3     | 93.73(17)  |
| Co(1)-O(1)                                                                    | 2.103(4)   | O(2)-Co(1)-O(2)#1   | 180.000(1) | O(4)-Co(2)-O(3)      | 88.78(17)  | N(3)#3-Co(3)-O(9)#3   | 87.25(18)  |
| Co(1)-N(1)                                                                    | 2.155(5)   | O(2)-Co(1)-O(1)#1   | 89.71(17)  | O(4)#2-Co(2)-O(3)    | 91.22(17)  | N(3)-Co(3)-O(9)#3     | 92.75(18)  |
| Co(1)-N(1)#1                                                                  | 2.155(5)   | O(2)#1-Co(1)-O(1)#1 | 90.29(17)  | N(2)#2-Co(2)-O(3)    | 90.55(19)  | O(9)-Co(3)-O(9)#3     | 180.0(4)   |
| Co(2)-O(4)                                                                    | 2.060(4)   | O(2)-Co(1)-O(1)     | 90.29(17)  | N(2)-Co(2)-O(3)      | 89.45(19)  | O(10)#4-Co(4)-O(10)   | 180.000(1) |
| Co(2)-O(4)#2                                                                  | 2.060(4)   | O(2)#1-Co(1)-O(1)   | 89.71(17)  | O(4)-Co(2)-O(3)#2    | 91.22(17)  | O(10)#4-Co(4)-O(11)#4 | 86.85(17)  |
| Co(2)-N(2)#2                                                                  | 2.132(5)   | O(1)#1-Co(1)-O(1)   | 180.000(1) | O(4)#2-Co(2)-O(3)#2  | 88.78(17)  | O(10)-Co(4)-O(11)#4   | 93.15(17)  |
| Co(2)-N(2)                                                                    | 2.132(5)   | O(2)-Co(1)-N(1)     | 90.22(19)  | N(2)#2-Co(2)-O(3)#2  | 89.45(19)  | O(10)#4-Co(4)-O(11)   | 93.15(17)  |
| Co(2)-O(3)                                                                    | 2.169(4)   | O(2)#1-Co(1)-N(1)   | 89.78(19)  | N(2)-Co(2)-O(3)#2    | 90.55(19)  | O(10)-Co(4)-O(11)     | 86.85(17)  |
| Co(2)-O(3)#2                                                                  | 2.169(4)   | O(1)#1-Co(1)-N(1)   | 88.08(19)  | O(3)-Co(2)-O(3)#2    | 180.0      | O(11)#4-Co(4)-O(11)   | 180.000(1) |
| Co(3)-O(8)#3                                                                  | 2.103(4)   | O(1)-Co(1)-N(1)     | 91.92(19)  | O(8)#3-Co(3)-O(8)    | 180.0(3)   | O(10)#4-Co(4)-N(4)    | 91.18(18)  |
| Co(3)-O(8)                                                                    | 2.103(4)   | O(2)-Co(1)-N(1)#1   | 89.78(19)  | O(8)#3-Co(3)-N(3)#3  | 90.70(19)  | O(10)-Co(4)-N(4)      | 88.82(18)  |
| Co(3)-N(3)#3                                                                  | 2.109(5)   | O(2)#1-Co(1)-N(1)#1 | 90.22(19)  | O(8)-Co(3)-N(3)#3    | 89.30(19)  | O(11)#4-Co(4)-N(4)    | 94.76(19)  |
| Co(3)-N(3)                                                                    | 2.109(5)   | O(1)#1-Co(1)-N(1)#1 | 91.92(19)  | O(8)#3-Co(3)-N(3)    | 89.30(19)  | O(11)-Co(4)-N(4)      | 85.24(19)  |
| Co(3)-O(9)                                                                    | 2.198(4)   | O(1)-Co(1)-N(1)#1   | 88.08(19)  | O(8)-Co(3)-N(3)      | 90.70(19)  | O(10)#4-Co(4)-N(4)#4  | 88.82(18)  |
| Co(3)-O(9)#3                                                                  | 2.198(4)   | N(1)-Co(1)-N(1)#1   | 180.000(1) | N(3)#3-Co(3)-N(3)    | 180.0(4)   | O(10)-Co(4)-N(4)#4    | 91.18(18)  |
| Co(4)-O(10)#4                                                                 | 2.147(4)   | O(4)-Co(2)-O(4)#2   | 180.00(14) | O(8)#3-Co(3)-O(9)    | 93.73(17)  | O(11)#4-Co(4)-N(4)#4  | 85.24(19)  |
| Co(4)-O(10)                                                                   | 2.147(4)   | O(4)-Co(2)-N(2)#2   | 90.07(19)  | O(8)-Co(3)-O(9)      | 86.27(17)  | O(11)-Co(4)-N(4)#4    | 94.76(19)  |
| Co(4)-O(11)#4                                                                 | 2.150(4)   | O(4)#2-Co(2)-N(2)#2 | 89.93(19)  | N(3)#3-Co(3)-O(9)    | 92.75(18)  | N(4)-Co(4)-N(4)#4     | 180.0      |
| Symmetry transformations used to generate equivalent atoms: #1 -x+2,-y+2,-z+1 |            |                     |            | #2 -x,-y+1,-z        |            | #3 -x,-y,-z           |            |
| #4 -x+2,-y+1,-z+                                                              |            |                     |            |                      |            |                       |            |
| Complex 7                                                                     |            |                     |            |                      |            |                       |            |
| Cu(1)-O(1)#1                                                                  | 1.9593(11) | O(1)#1-Cu(1)-N(1)   | 90.87(5)   | N(1)-Cu(1)-N(1)#1    | 180.000(1) | (1)#1-Cu(1)-O(1W)     | 89.08(5)   |
| Cu(1)-O(1)                                                                    | 1.9593(11) | O(1)-Cu(1)-N(1)     | 89.13(5)   | O(1)#1-Cu(1)-O(1W)   | 79.45(5)   | C(14)-O(1)-Cu(1)      | 122.93(11) |
| Cu(1)-N(1)                                                                    | 2.0016(12) | O(1)#1-Cu(1)-N(1)#1 | 89.13(5)   | O(1)-Cu(1)-O(1W)     | 100.55(5)  | C(5)-N(1)-Cu(1)       | 121.68(10) |
| Cu(1)-O(1W)                                                                   | 2.6787(15) | O(1)-Cu(1)-N(1)#1   | 90.87(5)   | N(1)-Cu(1)-O(1W)     | 90.92(5)   | C(1)-N(1)-Cu(1)       | 120.42(10) |
| O(1)#1-Cu(1)-O(1)                                                             | 180.0      |                     |            |                      |            |                       |            |
| Symmetry transformations used to generate equivalent atoms: #1 -x-1,-y+1,-z+1 |            |                     |            |                      |            |                       |            |
